# Supplementary material for: Plasma 2-arachidonoylglycerol is a biomarker of age and menopause related insulin resistance and dyslipidemia in lean but not in obese men and women
Source: PubMed Central journal article supplement — Mol Metab. 2017 Mar 21;6(5):406–15. doi: 10.1016/j.molmet.2017.03.005 (PMC5404099; doi:10.1016/j.molmet.2017.03.005), 2017-03-21
Supplement: mmc1.pdf [file mmc1.pdf]

**Supplemental Figure 1.** Sum of 2-arachidonoylglycerol and 1-arachidonoylglycerol (2AG+1AG) levels (Mean  $\pm$  SD) according to body mass index in premenopausal and menopausal females (A) and in males (B) (Two-way ANOVA)

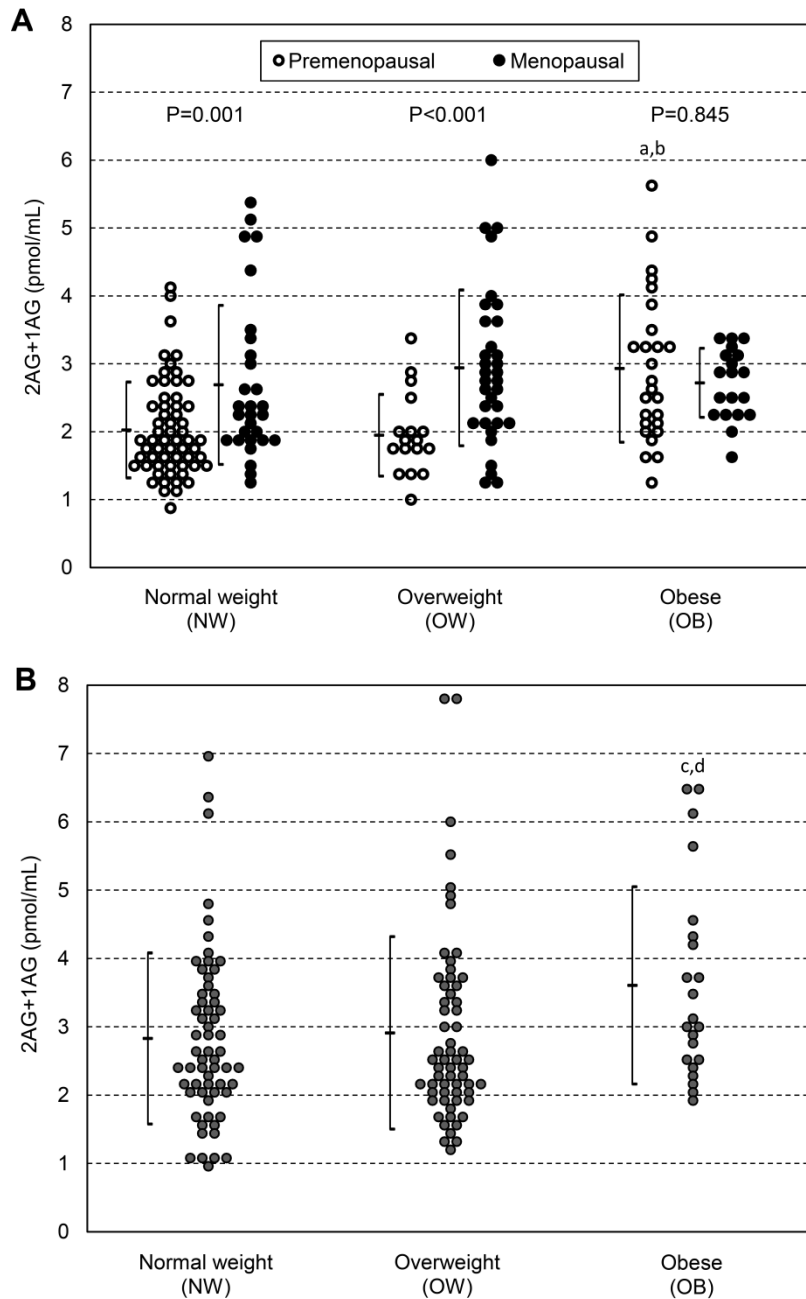

<sup>a</sup> P<0.001: OB vs. NW premenopausal women; <sup>b</sup> P<0.001: OB vs. OW premenopausal women; <sup>c</sup> P=0.012: OB vs. NW men; <sup>d</sup> P=0.038: OB vs. OW men. No significant differences were found by comparing pairs of BMI classes within menopausal women (OW vs. NW: P=0.299; OB vs. NW: P=0.446; OB vs. OW: P=0.890) and by comparing OW vs. NW premenopausal women (P=0.799), as well as no significant difference was found in OW vs. NW men (P=0.505).
